# Supplementary material for: A fluorescence-switchable luminogen in the solid state: a sensitive and selective sensor for the fast “turn-on” detection of primary amine gas
Source: Royal Society of Chemistry journal article supplement (doi:10.1039/c3cc41414k), 2013-01-01
Supplement: c3cc41414k.pdf [file c3cc41414k.pdf]

**Electronic Supplementary Information (ESI)**

**Fluorescence-Switchable Luminogen in Solid State: A  
Sensitive and Selective Sensor for the Fast “Turn-On”  
Detection of Primary Amine Gas**

*Tianyu Han,<sup>ab</sup> Jacky W. Y. Lam,<sup>a</sup> Na Zhao,<sup>a</sup> Meng Gao,<sup>a</sup> Zhiyong Yang,<sup>a</sup> Engui Zhao,<sup>a</sup>  
Yuping Dong<sup>\*b</sup> and Ben Zhong Tang<sup>\*acd</sup>*

*<sup>a</sup> Department of Chemistry, Institute for Advanced Study, State Key Laboratory of  
Molecular Neuroscience, Institute of Molecular Functional Materials and Division of  
Biomedical Engineering, The Hong Kong University of Science & Technology  
(HKUST), Clear Water Bay, Kowloon, Hong Kong, China. E-mail: tangbenz@ust.hk*

*<sup>b</sup> College of Materials Science and Engineering, Beijing Institute of Technology, 5  
South Zhongguancun Street, Beijing, 100081, China. E-mail: chdongyp@bit.edu.cn;  
fax: +86-10-6894-8982*

*<sup>c</sup> Guangdong Innovative Research Team, SCUT-HKUST Joint Research Laboratory,  
State Key Laboratory of Luminescent Materials and Device, South China University  
of Technology (SCUT), Guangzhou 510640, China.*

*<sup>d</sup> HKUST Shenzhen Research Institute, No. 9 Yuexing 1 st RD, South Area, Hi-tech  
Park, Nanshan, Shenzhen, China 518057.*

**Experimental section**

**Materials and Instrumentations**

Tetrahydrofuran (THF) and ethanol were distilled from sodium benzophenone ketyl and magnesium, respectively, under nitrogen immediately prior to use. Other chemicals were purchased from Aldrich and Alfa Aesar and used as received without further purification. <sup>1</sup>H spectra were measured on a Bruker AV 400 spectrometer in dimethylsulfoxide (DMSO) using tetramethylsilane (TMS;  $\delta = 0$ ) as internal reference.

High resolution mass spectra (HRMS) were recorded on a GCT premier CAB048 mass spectrometer operated in MALDI-TOF mode. UV spectra were measured on a Milton Roy Spectronic 3000 Array spectrophotometer. Photoluminescence (PL) spectra were recorded on a Perkin-Elmer LS 55 spectrofluorometer. The PL quantum yields ( $\Phi_F$ ) of TPPA in THF and THF/water mixtures were determined using quinine sulfate ( $\Phi_{FL}$  = 54% in 0.1 M sulfuric acid solution) as standard. The morphologies of the nanofibres of TPPA were investigated using JOEL 2010 Transmission Electron Microscopy (TEM). Powder X-ray diffraction (XRD) patterns were recorded on an X'pert PRO, PANalytical diffractometer. The ground-state geometries were optimized using the density functional (DFT) with B3LYP hybrid functional at the basis set level of 6-31G. All the calculations were performed using Gaussian 03 package.

### Synthesis

4-(2,5-diphenyl-1-pyrrolyl)benzoic acid (TPPA) was prepared according to the synthetic route shown in Scheme S1. Details can be found in our previous publications.<sup>1,2</sup> Its <sup>1</sup>HNMR and mass data are given below.

<sup>1</sup>H NMR (400 MHz, DMSO-*d*<sub>6</sub>),  $\delta$  (TMS, ppm): 13.15 (s, 1H), 7.86–7.84 (d, *J* = 8.4 Hz), 7.24–7.16 (m, 8H), 7.05–7.03 (d, *J* = 7.2 Hz), 6.51 (s, 2H). HRMS (MALDI-TOF): *m/z* 339.1255 [*M*<sup>+</sup>, calcd 339.1259].

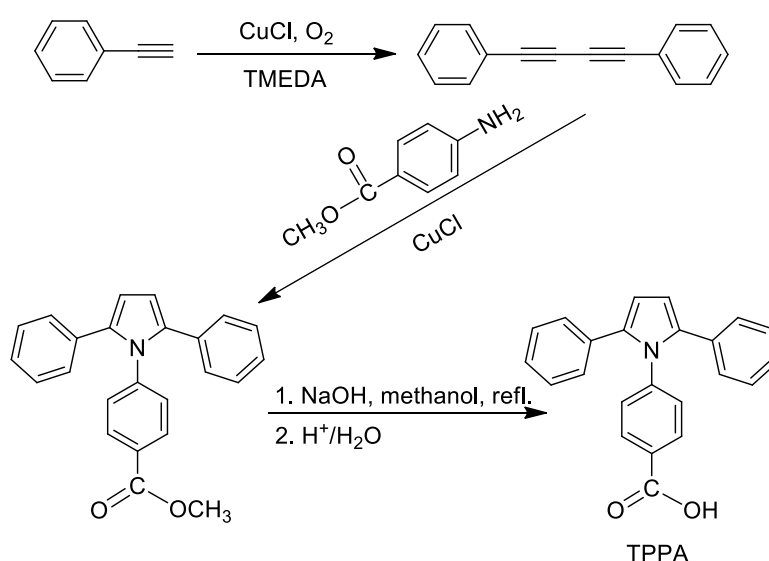

**Scheme S1** Synthetic route to TPPA

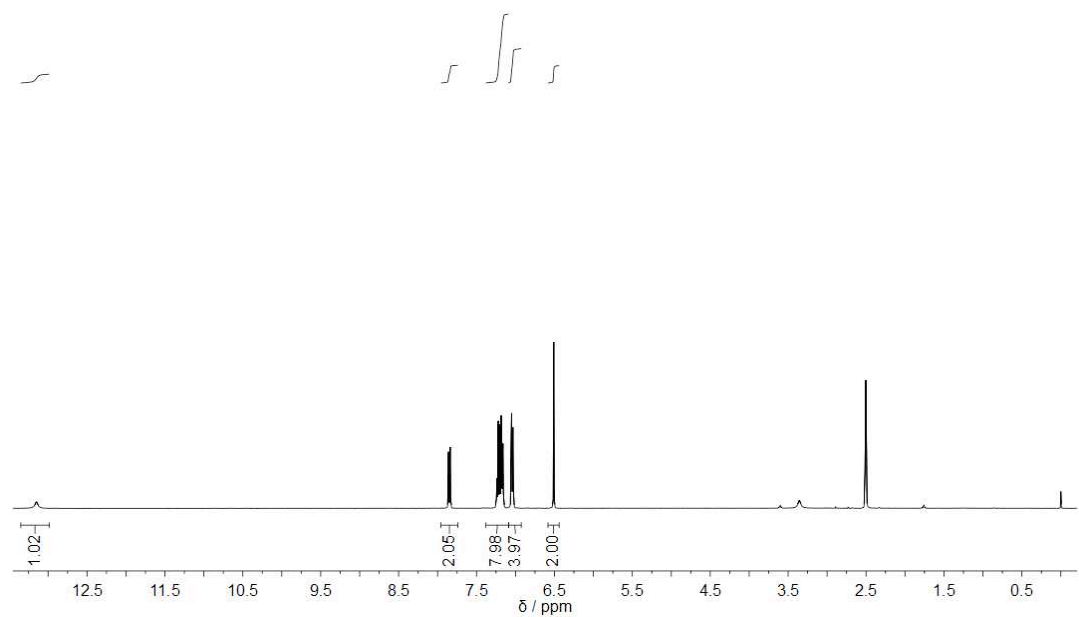

**Fig. S1**  $^1\text{H}$ NMR spectrum of TPPA.

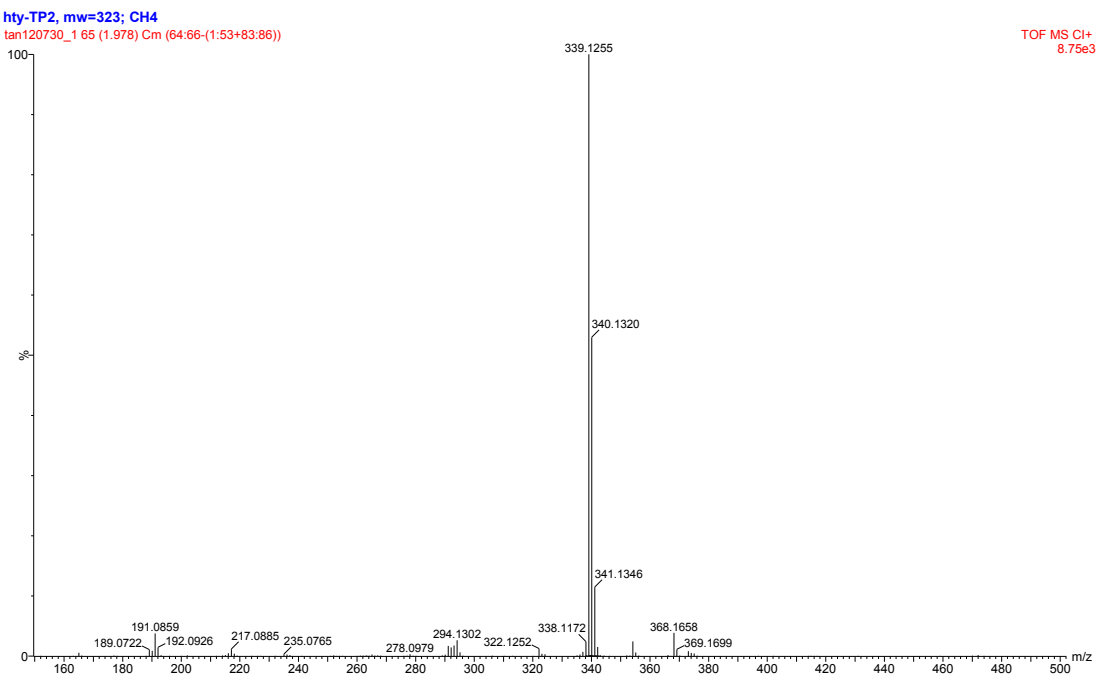

**Fig. S2** MALDI-TOF mass spectrum of TPPA.

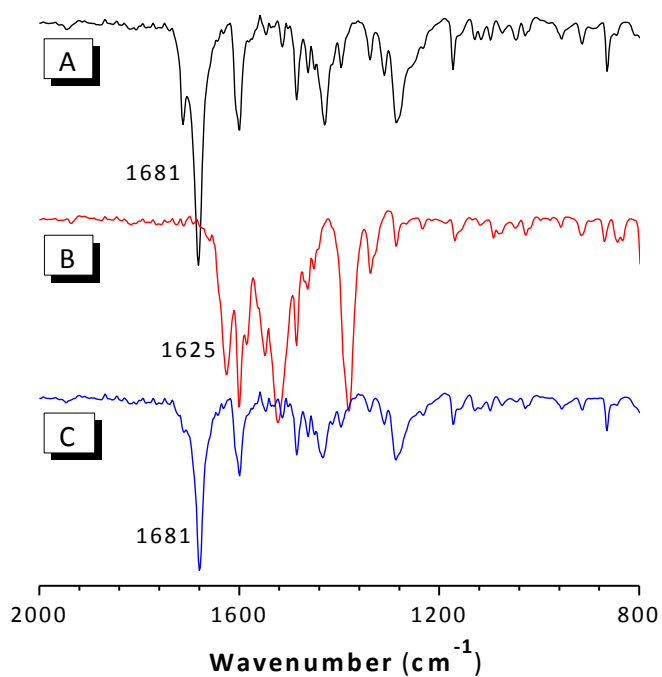

**Fig. S3** IR spectra of TPPA films (A) before and (B and C) after fumed with (B) butylamine and (C) triethylamine gas.

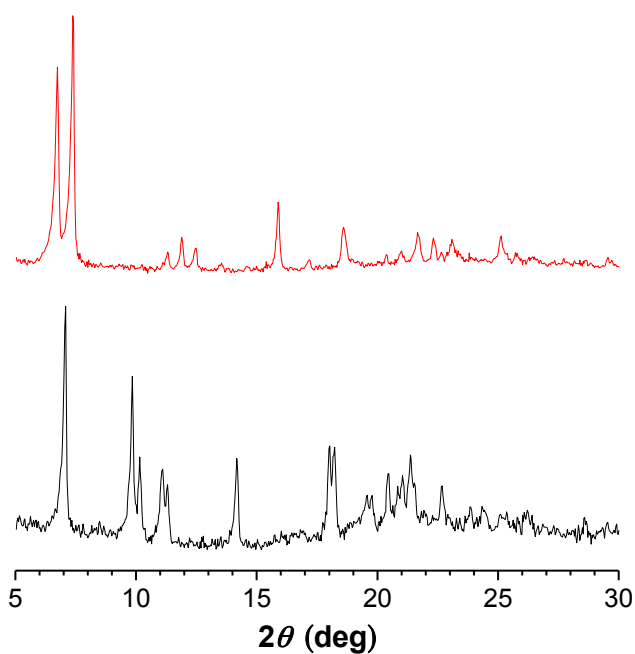

**Fig. S4** X-ray diffractograms of TPPA drop-casting films (red) before and (black) after exposed to butylamine gas.

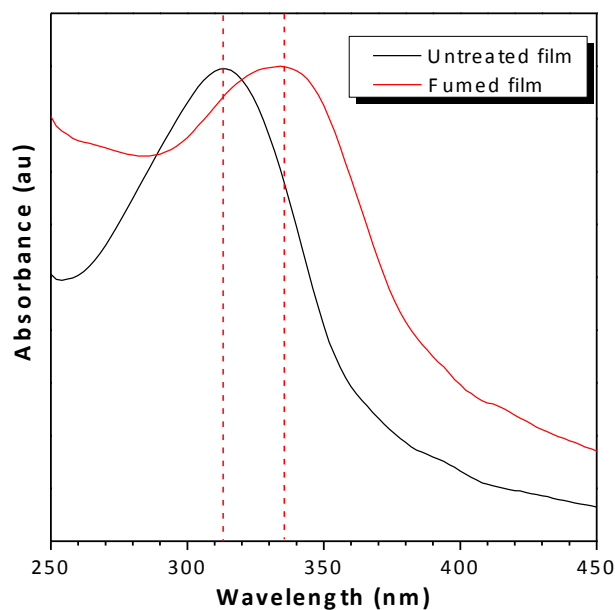

**Fig. S5** Absorption spectra of TPPA films before (black) and after (red) fumed by butylamine gas.

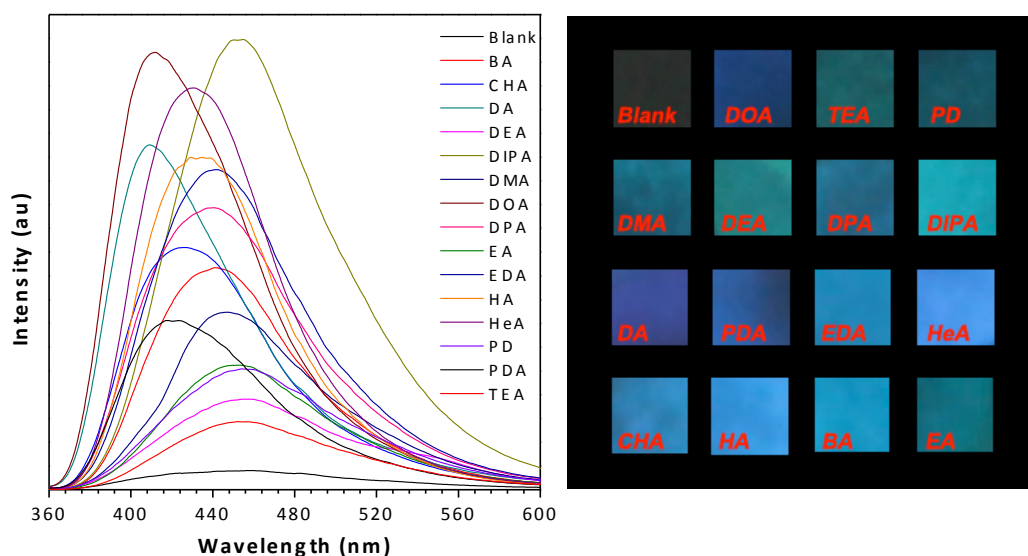

**Fig. S6** Fluorescent photos and emission spectra of TPPA-loaded filter paper strips after dipped into different amines. Abbreviation: ethylamine (EA), butylamine (BA), hexylamine (HA), cyclohexylamine (CHA), heptylamine (HeA), ethylenediamine (EDA), propanediamine (PDA), pyridine (PD), dimethylamine (DMA), diethylamine (DEA), dipropylamine (DPA), *N,N*-diisopropylamine (DIPA), decylamine (DA), di-*n*-octylamine (DOA) and triethylamine (TEA). Excitation wavelength: 350 nm. The photos were taken under 365 nm UV irradiation from a hand-held UV lamp.

## References

- 1 X. Feng, B. Tong, J. B. Shen, J. B. Shi, T. Y. Han, L. Chen, J. G. Zhi, P. Lu, Y. G. Ma and Y. P. Dong, *J. Phys. Chem. B*, 2010, **114**, 16731.
- 2 T. Y. Han, X. Feng, B. Tong, J. B. Shi, L. Chen, J. G. Zhi and Y. P. Dong, *Chem. Commun.*, 2012, **48**, 416.
